# Supplementary material for: Genomic signatures of pre-resistance in Mycobacterium tuberculosis
Source: PubMed Central journal article supplement (PMC8674244; doi:10.1038/s41467-021-27616-7), 2021-12-15
Supplement: 41467_2021_27616_MOESM3_ESM.pdf [file 41467_2021_27616_MOESM3_ESM.pdf]

## **Description of Additional Supplementary Files**

File Name: Supplementary Data 1

Description: Accession code and collection date of *M. tuberculosis* whole-genome sequences collected at the population level in Lima, Peru.

File Name: Supplementary Data 2

Description: Accession codes, collection date and geographical metadata of *M. tuberculosis* global representatives.

File Name: Supplementary Data 3

Description: Accession codes and collection date of *M. tuberculosis* lineage 4 global data set.
